# Supplementary material for: Efficacy of antimalarial drugs for treatment of uncomplicated falciparum malaria in Asian region: A network meta-analysis
Source: PLOS journal article supplement (doi:10.1371/journal.pone.0225882), 2019-12-19
Supplement: S10 (10.1371/journal.pone.0225882.s010) [file journal.pone.0225882.s010]

**S4 Fig. Cumulative probability curves for the antimalarial network**

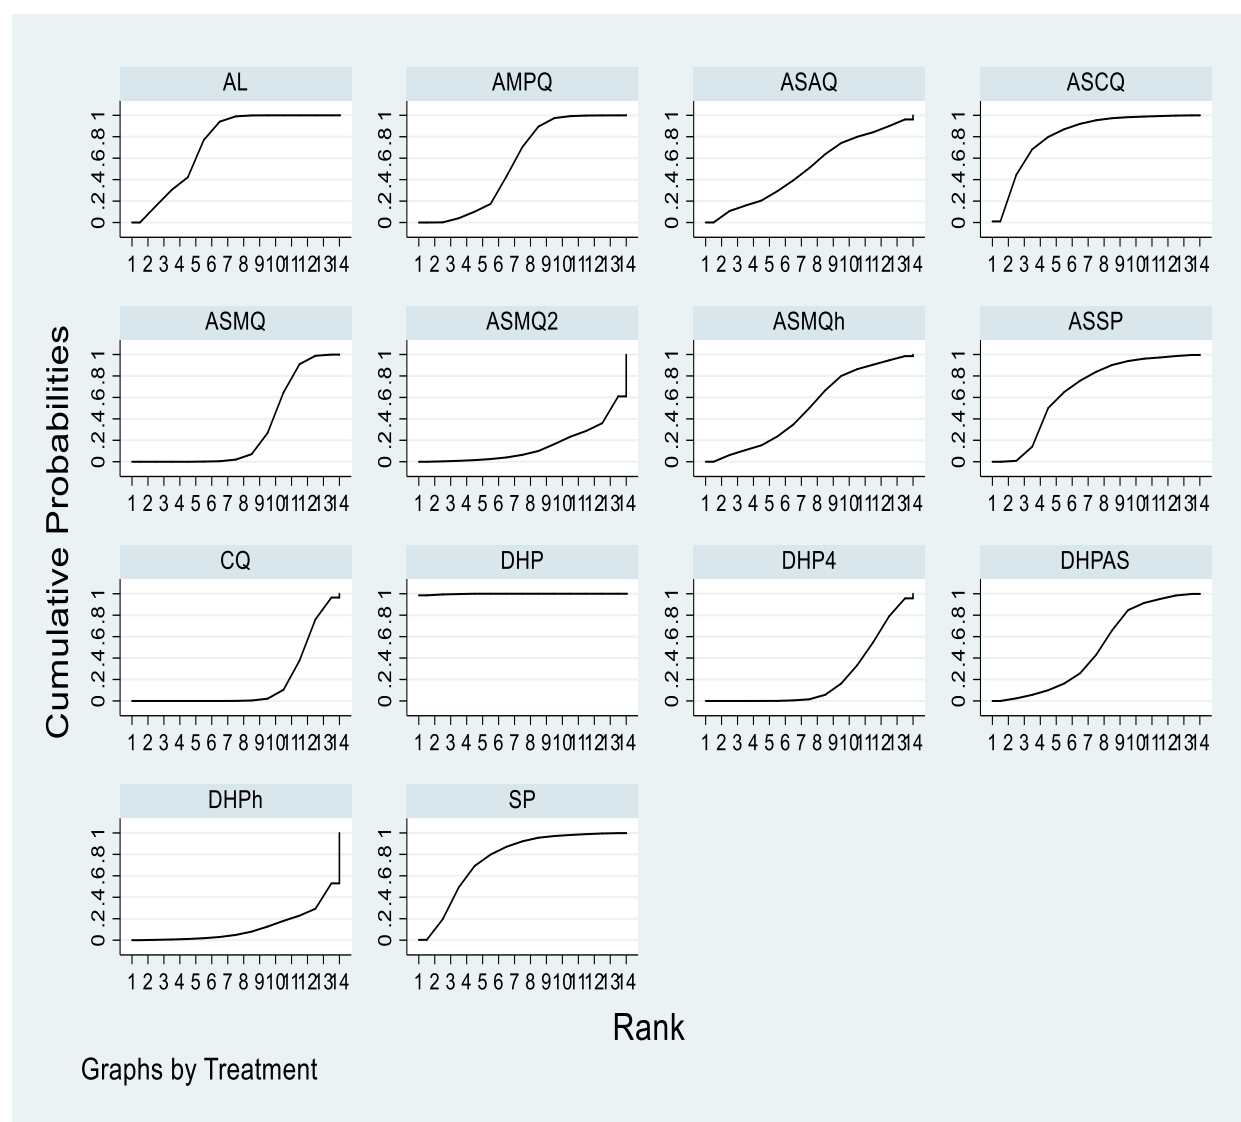

Abbreviations of the drugs are as stated in Table 1
